# Supplementary material for: A randomized, controlled trial evaluating the efficacy of an online intervention targeting vitamin D intake, knowledge and status among young adults
Source: PubMed Central journal article supplement (PMC5106840; doi:10.1186/s12966-016-0443-1), 2016-11-11
Supplement: 12966_2016_443_MOESM3_ESM.pdf [file 12966_2016_443_MOESM3_ESM.pdf]

Additional File 2: Additional Tables

**Table A.1: Means and Standard Deviations for Perceived Importance of Vitamin D-Related Behaviours among Intervention Study Participants Over Time (n=90)**

| <b>Variable*</b>                                                                                                              | <b>Intervention (n=41)<br/>M (SD)</b> | <b>Control (n=49)<br/>M (SD)</b> |
|-------------------------------------------------------------------------------------------------------------------------------|---------------------------------------|----------------------------------|
| <b>From a health perspective, it is important for me to regularly take supplements or multivitamins containing vitamin D.</b> |                                       |                                  |
| Time 1 (Baseline)                                                                                                             | 3.17 (1.09)                           | 2.98 (1.25)                      |
| Time 2                                                                                                                        | 3.56 (1.14)                           | 2.98 (1.23)                      |
| Time 3 (Follow-up)                                                                                                            | 3.71 (1.12)                           | 3.24 (1.28)                      |
| <b>From a health perspective, it is important for me to take vitamin D supplements in the spring/summer months in Canada.</b> |                                       |                                  |
| Time 1 (Baseline)                                                                                                             | 2.88 (1.05)                           | 2.53 (1.08)                      |
| Time 2                                                                                                                        | 2.98 (1.17)                           | 2.67 (1.09)                      |
| Time 3 (Follow-up)                                                                                                            | 2.95 (1.07)                           | 2.82 (1.32)                      |
| <b>From a health perspective, it is important for me to take vitamin D supplements in the fall/winter months in Canada.</b>   |                                       |                                  |
| Time 1 (Baseline)                                                                                                             | 4.07 (0.88)                           | 3.67 (1.09)                      |
| Time 2                                                                                                                        | 4.27 (0.95)                           | 3.73 (1.10)                      |

Time 3 (Follow-up)      4.12 (1.01)                      3.78 (1.25)

**From a health perspective, it is important for me to consume milk, dairy and/or fortified non-dairy alternatives every day.**

Time 1 (Baseline)      4.17 (1.14)                      3.92 (1.22)

Time 2                      4.12 (0.93)                      4.12 (0.95)

Time 3 (Follow-up)      4.12 (0.98)                      4.29 (0.84)

**Consuming milk, dairy, and/or fortified non-dairy alternatives is a challenge for me.**

Time 1 (Baseline)      2.44 (1.48)                      2.49 (1.45)

Time 2                      3.17 (1.47)                      2.33 (1.18)

Time 3 (Follow-up)      3.22 (1.26)                      2.94 (1.38)

**From a health perspective, it is important for me to get some sun exposure every day.**

Time 1 (Baseline)      4.05 (1.05)                      4.14 (0.94)

Time 2                      4.07 (0.99)                      4.12 (0.86)

Time 3 (Follow-up)      3.95 (1.12)                      4.43 (0.76)

---

\*Response range 1-5 (1=strongly disagree; 5=strongly agree)

**Table A.2: Response Frequencies for Feedback Survey among Intervention Group (n=41)**

| <b>Variable</b>                                                                                                                       | <b>Frequency<br/>% (n)</b> |
|---------------------------------------------------------------------------------------------------------------------------------------|----------------------------|
| <b>How much would you say watching the video influenced you to make changes to your dietary intake of foods containing vitamin D?</b> |                            |
| Did not influence me at all                                                                                                           | 17.1% (7)                  |
| Did not influence me very much                                                                                                        | 31.7% (13)                 |
| Influenced me somewhat                                                                                                                | 36.6% (15)                 |
| Influenced me very much                                                                                                               | 12.2% (5)                  |
| I do not remember                                                                                                                     | 2.4% (2)                   |
| <b>How much would you say watching the video influenced you to make changes to your dietary intake of foods containing calcium?</b>   |                            |
| Did not influence me at all                                                                                                           | 19.5% (8)                  |
| Did not influence me very much                                                                                                        | 29.3% (12)                 |
| Influenced me somewhat                                                                                                                | 41.5% (17)                 |
| Influenced me very much                                                                                                               | 7.3% (3)                   |
| I do not remember                                                                                                                     | 2.4% (1)                   |
| <b>How much would you say watching the video influenced you to take a supplement or multivitamin containing vitamin D?</b>            |                            |
| Did not influence me at all                                                                                                           | 31.7% (13)                 |
| Did not influence me very much                                                                                                        | 24.4% (10)                 |

|                         |            |
|-------------------------|------------|
| Influenced me somewhat  | 29.3% (12) |
| Influenced me very much | 12.2% (5)  |
| I do not remember       | 2.4% (1)   |

**How much would you say watching the video influenced to spend more time in the sun?**

|                                |            |
|--------------------------------|------------|
| Did not influence me at all    | 22.0% (9)  |
| Did not influence me very much | 26.8% (11) |
| Influenced me somewhat         | 34.1% (14) |
| Influenced me very much        | 14.6% (6)  |
| I do not remember              | 2.4% (1)   |

After watching the video, we provided you with some information about vitamin D.

**How much would you say reading this information influenced you to make changes to your dietary intake of foods containing vitamin D?**

|                                |            |
|--------------------------------|------------|
| Did not influence me at all    | 14.6% (6)  |
| Did not influence me very much | 24.4% (10) |
| Influenced me somewhat         | 29.3% (12) |
| Influenced me very much        | 24.4% (10) |
| I do not remember              | 7.3% (3)   |

**How much would you say using reading this information influenced you to make changes to your dietary intake of foods containing calcium?**

|                                |            |
|--------------------------------|------------|
| Did not influence me at all    | 12.2% (5)  |
| Did not influence me very much | 34.1% (14) |

|                         |            |
|-------------------------|------------|
| Influenced me somewhat  | 31.7% (13) |
| Influenced me very much | 14.6% (6)  |
| I do not remember       | 7.3% (3)   |

**How much would you say reading this information influenced you to take a supplement or multivitamin containing vitamin D?**

|                                |            |
|--------------------------------|------------|
| Did not influence me at all    | 24.4% (10) |
| Did not influence me very much | 24.4% (10) |
| Influenced me somewhat         | 26.8% (11) |
| Influenced me very much        | 17.1% (7)  |
| I do not remember              | 7.3% (3)   |

**How much would you say reading this information influenced you to spend more time in the sun?**

|                                |            |
|--------------------------------|------------|
| Did not influence me at all    | 19.5% (8)  |
| Did not influence me very much | 24.4% (10) |
| Influenced me somewhat         | 34.1% (14) |
| Influenced me very much        | 14.6% (6)  |
| I do not remember              | 7.3% (3)   |

**How much would you say receiving the “Vitamin D Tips & Tricks” newsletters influenced you to make changes to your dietary intake of foods containing vitamin D?**

|                                |            |
|--------------------------------|------------|
| Did not influence me at all    | 2.4% (1)   |
| Did not influence me very much | 29.3% (12) |

|                                      |           |
|--------------------------------------|-----------|
| Influenced me somewhat               | 19.5% (8) |
| Influenced me very much              | 19.5% (8) |
| N/A – I did not read the newsletters | 22.0% (9) |
| I do not remember                    | 7.3% (3)  |

**How much would you say receiving the “Vitamin D Tips & Tricks” newsletters influenced you to make changes to your dietary intake of foods containing calcium?**

|                                      |            |
|--------------------------------------|------------|
| Did not influence me at all          | 4.9% (2)   |
| Did not influence me very much       | 26.8% (11) |
| Influenced me somewhat               | 29.3% (12) |
| Influenced me very much              | 9.8% (4)   |
| N/A – I did not read the newsletters | 22.0% (9)  |
| I do not remember                    | 7.3% (3)   |

**How much would you say receiving the “Vitamin D Tips & Tricks” newsletters influenced you to take a supplement or multivitamin containing vitamin D?**

|                                      |           |
|--------------------------------------|-----------|
| Did not influence me at all          | 12.2% (5) |
| Did not influence me very much       | 19.5% (8) |
| Influenced me somewhat               | 22.0% (9) |
| Influenced me very much              | 17.1% (7) |
| N/A – I did not read the newsletters | 22.0% (9) |
| I do not remember                    | 7.3% (3)  |

**How much would you say receiving the “Vitamin D Tips & Tricks” newsletters influenced you to spend more time in the sun?**

|                                      |            |
|--------------------------------------|------------|
| Did not influence me at all          | 14.6% (6)  |
| Did not influence me very much       | 17.1% (7)  |
| Influenced me somewhat               | 24.4% (10) |
| Influenced me very much              | 19.5% (8)  |
| N/A – I did not read the newsletters | 22.0% (9)  |
| I do not remember                    | 7.3% (3)   |

**How much would you say using the app influenced you to make changes to your dietary intake of foods containing vitamin D?**

|                                |            |
|--------------------------------|------------|
| Did not influence me at all    | 24.4% (10) |
| Did not influence me very much | 14.6% (6)  |
| Influenced me somewhat         | 26.8% (11) |
| Influenced me very much        | 24.4% (10) |
| N/A – I did not use the app    | 9.8% (4)   |

**How much would you say using the app influenced you to make changes to your dietary intake of foods containing calcium?**

|                                |            |
|--------------------------------|------------|
| Did not influence me at all    | 29.3% (12) |
| Did not influence me very much | 17.1% (7)  |
| Influenced me somewhat         | 24.4% (10) |
| Influenced me very much        | 19.5% (8)  |

N/A – I did not use the app 9.8% (4)

**How much would you say the app influenced you to take a supplement or multivitamin containing vitamin D?**

Did not influence me at all 43.9% (18)

Did not influence me very much 12.2% (5)

Influenced me somewhat 17.1% (7)

Influenced me very much 17.1% (7)

N/A – I did not use the app 9.8% (4)

**How much would you say the app influenced you to spend more time in the sun?**

Did not influence me at all 43.9% (18)

Did not influence me very much 14.6% (6)

Influenced me somewhat 24.4% (10)

Influenced me very much 7.3% (3)

N/A – I did not use the app 9.8% (4)

**How much did you like using the app?**

Did not like using it at all 19.5% (8)

Did not like using it very much 19.5% (8)

Liked using it somewhat 39.0% (16)

Liked using it very much 7.3% (3)



N/A – I did not use the app 14.6% (6)

**How easy was it to use the app?**

Very difficult 9.8% (4)

Somewhat difficult 26.8% (11)

Somewhat easy 22.0% (9)

Very easy 31.7% (13)

N/A – I did not use the app 9.8% (4)

---

**Table A.3: Mean Rankings of Intervention Components on Perceived Influence of Behaviour Change (Feedback Survey, n=41)**

| <b>Dependent Variable*</b>                                                 | <b>Intervention Components</b>       |                                      |                                                 |                                            |
|----------------------------------------------------------------------------|--------------------------------------|--------------------------------------|-------------------------------------------------|--------------------------------------------|
| <i>How much did the [intervention component] influence you to...</i>       | <b>Intervention video<br/>M (SD)</b> | <b>Information slides<br/>M (SD)</b> | <b>Tips &amp; Tricks newsletters<br/>M (SD)</b> | <b>Vitamin D Calculator app<br/>M (SD)</b> |
| <b>Make changes to dietary intake of foods containing vitamin D (n=25)</b> | 2.48 (0.82)                          | 2.80 (1.00)                          | 2.80 (0.91)                                     | 2.76 (1.05)                                |
| <b>Make changes to dietary intake of foods containing calcium (n=24)</b>   | 2.50 (0.83)                          | 2.67 (0.82)                          | 2.67 (0.82)                                     | 2.58 (1.10)                                |
| <b>Take a supplement or multivitamin containing vitamin D (n=25)</b>       | 2.36 (1.00)                          | 2.52 (1.05)                          | 2.60 (1.04)                                     | 2.36 (1.22)                                |
| <b>Spend more time in the sun (n=26)</b>                                   | 2.65 (0.98)                          | 2.58 (1.03)                          | <b>2.69 (1.05)<sup>a</sup></b>                  | <b>2.08 (1.09)<sup>a</sup></b>             |

<sup>a</sup> Significantly different at  $p < 0.008$

\* Response range 1-4 (1=did not influence me at all; 4=influenced me very much)
